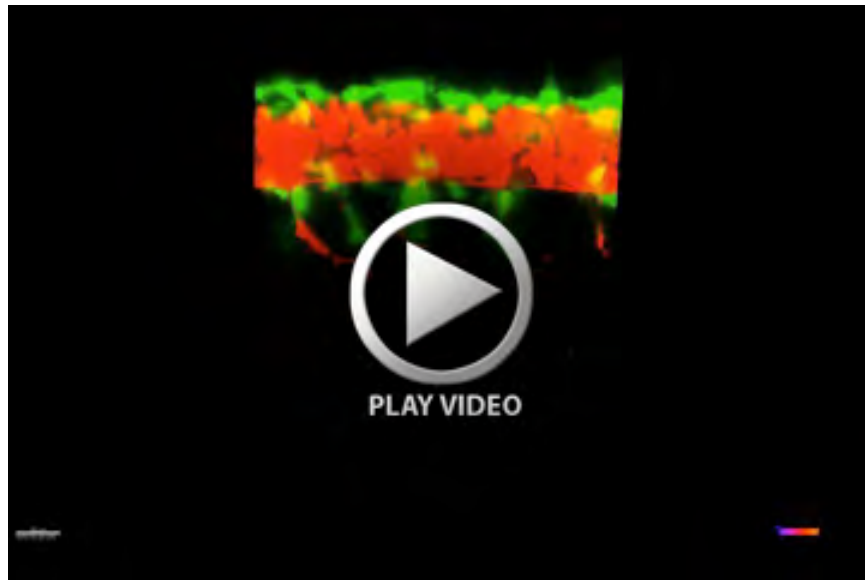

**Movie 1. Melanoblasts migrate along the motor neurons.** For further explanation see legend to Fig. 1.

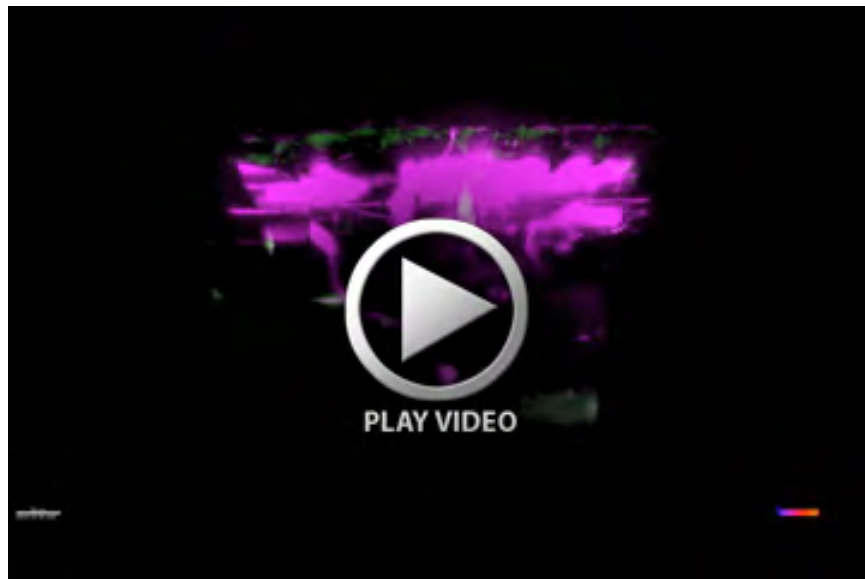

**Movie 2. Tracing a clone of individual MPs during regeneration in chimeric animals.** For further explanation see legend to Fig. 5.

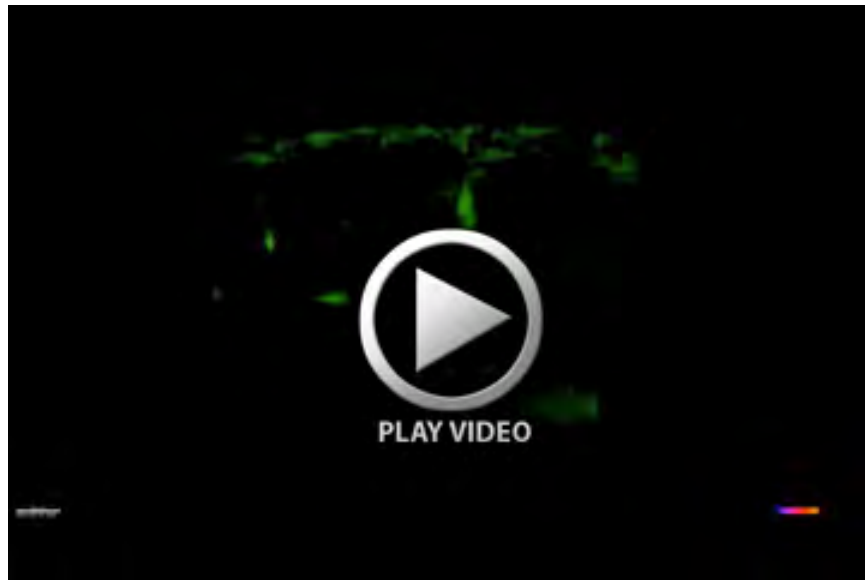

**Movie 3. Tracing a clone of individual MPs during regeneration in chimeric animals.** Green channel of Movie 3.

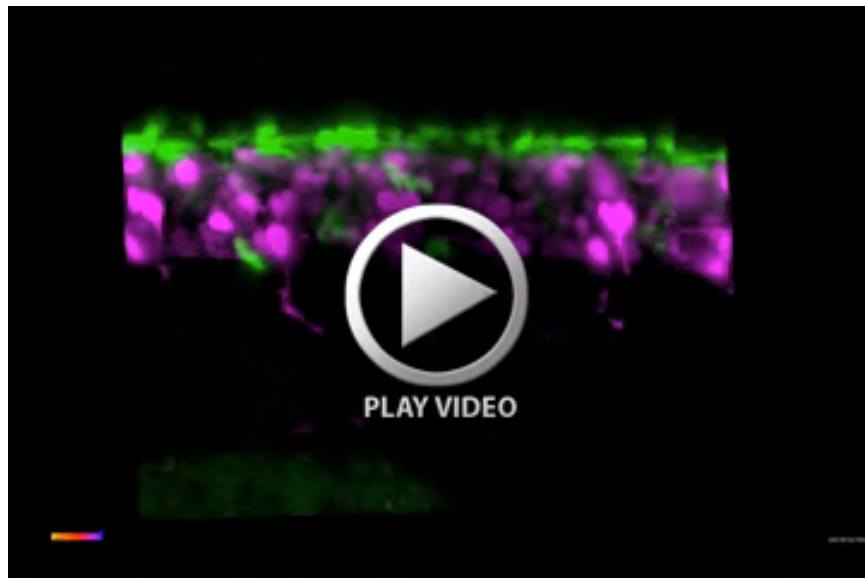

**Movie 4. Melanoblast migration along the ventromedial path is blocked in *erbb2b* mutants.** Imaging of *Tg(mitfa:gfp;nbt:DsRed)* embryos between 20 and 30 hpf, 1 frame per 15 minutes. The motoneurons remain uncovered by GFP-positive cells, whereas some melanoblasts can be seen migrating ventrally along the dorsolateral path. Movie 1 shows the wild type for comparison.
